# Supplementary material
Source: publisher site journal article supplement (https://www.spandidos-publications.com/332/downloadSupplementary)
Supplement: Supplementary file 1 [file downloadSupplementary]

## Sheet: Sheet1
Table SII. Detailed information of genes with G-protein-related functions in DNAH17-AS1 and RP11-400N13.2.
Genes with G-protein-related functions in DNAH17-AS1	Genes with G-protein-related functions in RP11-400N13.2
GHRHR	MAS1
GPR139	OR13H1
GPR45	OR2AG2
HTR1A	OR52B2
HTR1E	OR52B6
HTR5A	OR52D1
HTR6	OR9A4
MC2R	PDC
MC3R	PTH
MC5R	TAS2R4
MRGPRD	TAS2R41
MRGPRG	TAS2R60
MRGPRX4
MTNR1B
NPBWR1
NPBWR2
OPN1LW
OPN1MW
OPN4
OR10AG1
OR10H1
OR10H2
OR10H3
OR10H5
OR10S1
OR1J4
OR1K1
OR1S2
OR2AJ1
OR4C5
OR4D10
OR4D6
OR4D9
OR4E2
OR5M8
OR6C6
OR6S1
OR7A10
OR7C2
PRLH
PROKR2
RHO
ZACN
